# Supplementary material for: Functional Relevance and Structural Correlates of Near Infrared and Short Wavelength Fundus Autofluorescence Imaging in ABCA4-Related Retinopathy
Source: PubMed Central journal article supplement — Transl Vis Sci Technol. 2019 Dec 20;8(6):46. doi: 10.1167/tvst.8.6.46 (PMC6927733; doi:10.1167/tvst.8.6.46), 2019-12-20
Supplement: tvst-08-06-20_s01.pdf [file tvst-08-06-20_s01.pdf]

## Supplementary Figure S1: Correlation of retinal phenotype and electroretinogram

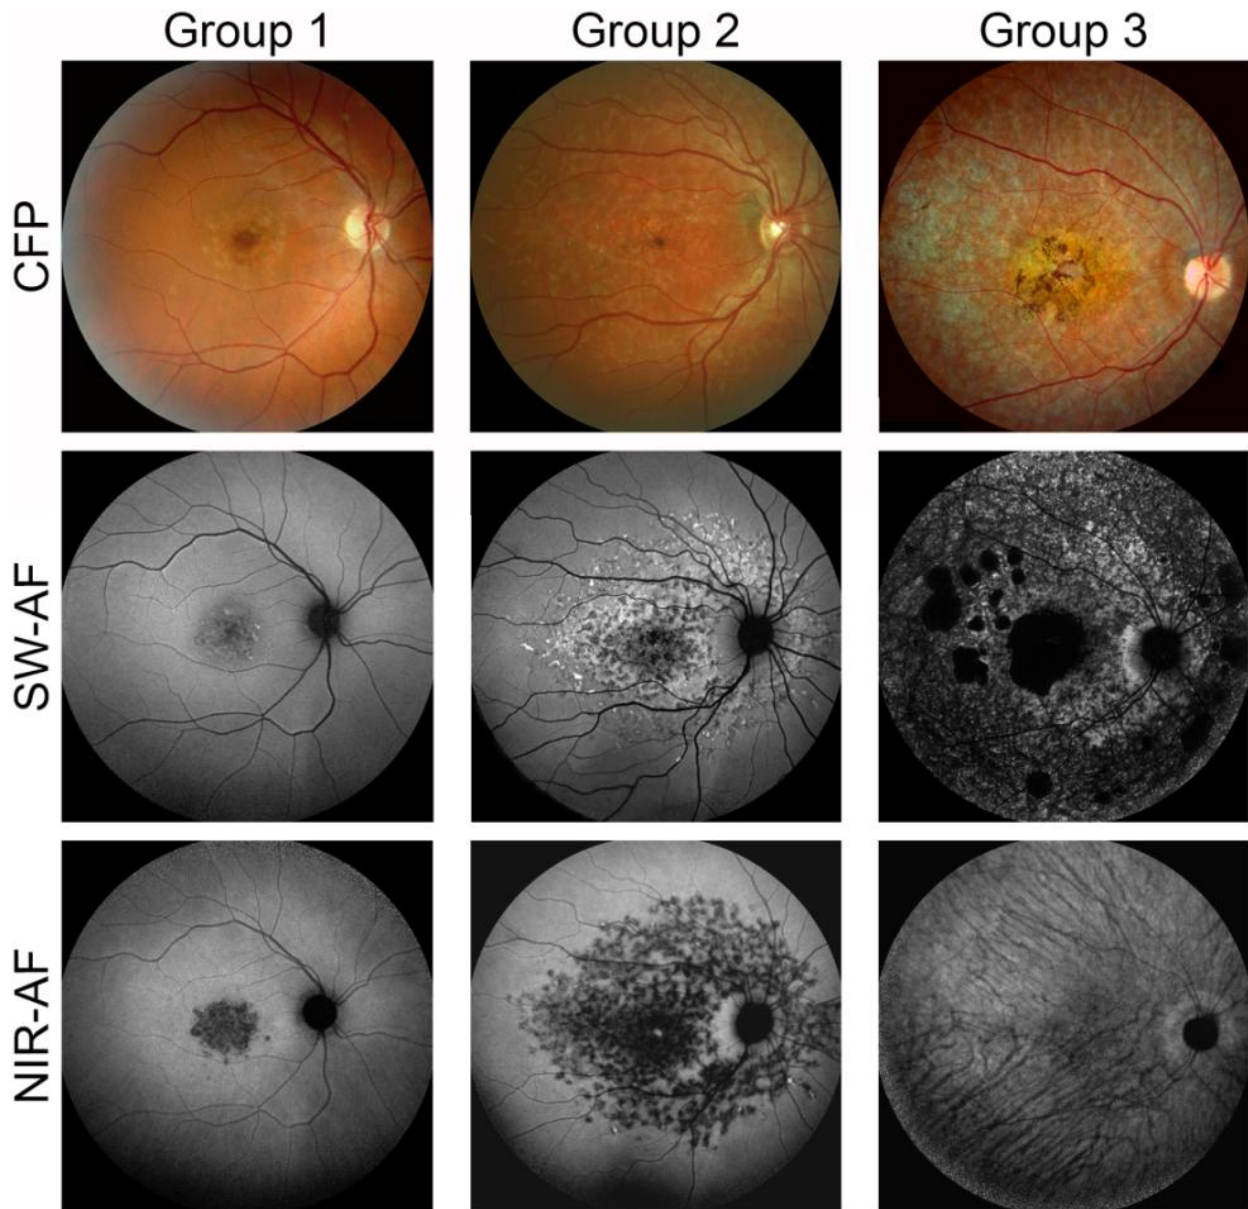

Characteristic color fundus photographs (CFP, top row), short wavelength (SW-AF, second row) as well as in near infrared (NIR-AF, last row) fundus autofluorescence images of the variable spectrum of disease manifestation. In all included eyes, full-field ERG-based Lois classification<sup>1</sup> closely correlated with AF-based classification as recommended by Fujinami and colleagues:<sup>2</sup> Group 1 eyes showed circumscribed phenotypes with foveal involvement surrounded by a homogeneous background with/without perifoveal foci of high or low AF signal, group 2 eyes revealed localized low AF signal at the macula surrounded by a heterogeneous background with widespread foci of high or low AF signal extending anterior to the vascular arcades and group 3 eyes showed most widespread disease manifestation with multiple areas of low AF signal at the posterior pole and a heterogeneous background with foci of high or low AF signal. Of note, the central area of low autofluorescence signal differs from macular pigment shadowing that would be expected to be homogenous with graduate fading towards 6° eccentricity.

## REFERENCES

1. Lois N, Holder GE, Bunce C, Fitzke FW, Bird AC. Phenotypic subtypes of Stargardt macular dystrophy-fundus flavimaculatus. *Arch Ophthalmol* [Internet]. 2001 Mar [cited 2014 Jul 23];119(3):359–69. Available from: <http://www.ncbi.nlm.nih.gov/pubmed/11231769>
2. Fujinami K, Lois N, Mukherjee R, McBain VA, Tsunoda K, Tsubota K, et al. A longitudinal study of Stargardt disease: quantitative assessment of fundus autofluorescence, progression, and genotype correlations. *Invest Ophthalmol Vis Sci* [Internet]. 2013 Dec [cited 2014 Jul 15];54(13):8181–90. Available from: <http://www.ncbi.nlm.nih.gov/pubmed/24265018>
