# Supplementary material for: Functional Relevance and Structural Correlates of Near Infrared and Short Wavelength Fundus Autofluorescence Imaging in ABCA4-Related Retinopathy
Source: PubMed Central journal article supplement — Transl Vis Sci Technol. 2019 Dec 20;8(6):46. doi: 10.1167/tvst.8.6.46 (PMC6927733; doi:10.1167/tvst.8.6.46), 2019-12-20
Supplement: tvst-08-06-20_s02.pdf [file tvst-08-06-20_s02.pdf]

**Supplementary Table S1: Demographic, genetic and functional data of included subjects.**

| No.            | Sex | Age<br>[Years] | Onset<br>[Years] | BCVA<br>[LogMAR] |     | ABCA4-gene mutations*                                        |                                                             |
|----------------|-----|----------------|------------------|------------------|-----|--------------------------------------------------------------|-------------------------------------------------------------|
|                |     |                |                  | OD               | OS  | Allele 1                                                     | Allele 2                                                    |
| <i>Group 1</i> |     |                |                  |                  |     |                                                              |                                                             |
| 1              | F   | 12             | 10               | 0.9              | 0.9 | E49 c.6746C>A/p.(Ala2249Asp)                                 | E49 c.6746C>A/p.(Ala2249Asp)                                |
| 2              | F   | 53             | 20               | 1.0              | 0.9 | E42 c.5882G>A/p.(Gly1961Glu)                                 | I36 c.5916+2T>C                                             |
| 3              | F   | 17             | 17               | 1.0              | 0.3 | E12 c.1622T>C/p.(Leu541Pro)<br>E21 c.3113C>T/p.(Ala1038Val)  | E17 c.2588G>C/p.(Gly863Ala)<br>E40 c.5603A>T/p.(Asn1868Ile) |
| 4              | F   | 31             | 19               | 0.9              | 1.0 | E3 c.206G>A/p.(Trp69*)                                       | E42 c.5882G>A/p.(Gly1961Glu)                                |
| 5              | M   | 21             | 7                | 0.9              | 0.9 | E6 c.656G>C/p.(Arg219Thr)<br>E17 c.2588G>C/p.(Gly863Ala)     | E10 c.1253T>C/p.(Phe418Ser)<br>E40 c.5603A>T/p.(Asn1868Ile) |
| 6              | F   | 42             | 18               | 0.8              | 1.0 | E6 c.768G>T/p.(Val256Val)                                    | E42 c.5882G>A/p.(Gly1961Glu)                                |
| 7              | F   | 37             | 20               | 0.5              | 1.0 | E42 c.5882G>A/p.(Gly1961Glu)                                 | I36 c.5916+2T>C                                             |
| 8              | F   | 34             | 31               | 0.7              | 0.1 | E28 c.3195G>A/p.(Glu1399Lys)<br>E44 c.6079C>T/p.(Leu2027Phe) | E43 c.5929G>A/p.(Gly1977Ser)                                |
| 9              | M   | 39             | 14               | 0.9              | 0.9 | E12 c.1584C>A/p.(Tyr528*)                                    | E42c.5882G>A/p.(Gly1961Glu)                                 |
| 10             | M   | 54             | 42               | 1.1              | 0.2 | E35 c.4918C>T/p.(Arg1640Trp)                                 | E40 c.5693G>A/p.(Arg1898His)                                |
| 11             | F   | 15             | 6                | 0.5              | 0.3 | E10 c.1309delC/p.(Gln437Argfs*12)                            | E42 c.5882G>A/p.(Gly1961Glu)                                |
| 12             | F   | 34             | 27               | 0.9              | 0.7 | E15 c.2300T>A/p.(Val767Asp)                                  | E42 c.5882G>A/p.(Gly1961Glu)                                |
| 13             | M   | 57             | 47               | 1.5              | 1.5 | E27 c.3871C>T/p.(Glu1291*)                                   | E42 c.5882G>A/p.(Gly1961Glu)                                |
| 14             | F   | 30             | 27               | 1.5              | 1.5 | E42 c.5882G>A/p.(Gly1961Glu)                                 | E43 c.5917delG/p.(Val1973*)                                 |
| 15             | F   | 14             | 6                | 0.6              | 0.5 | E3 c.194G>A/p.(Gly65Glu)                                     | E17 c.2588G>C/p.(Gly963Ala)                                 |
| 16             | F   | 36             | 30               | 0.9              | 0.7 | E39 c.5512C>G/p.(His1838Asp)<br>E42 c.5882G>A/p.(Gly1961Glu) | E42 c.5882G>A/p.(Gly1961Glu)                                |
| 17             | F   | 23             | 17               | 0.8              | 0.7 | E10 c.1309delC/p.(Glu437Argfs*12)                            | E42 c.5882G>A/p.(Gly1961Glu)                                |
| 18             | F   | 10             | 6                | 0.3              | 0.3 | E12 c.1622T>C/p.(Leu541Pro)<br>E21 c.3113C>T/p.(Ala1038Val)  | E13 Del.                                                    |
| 19             | F   | 36             | 33               | 0.8              | 0.8 | E21 c.3113C>T/p.(Ala1038Val)                                 | E28 c.4234C>T/p.(Gln1412*)                                  |
| 20             | F   | 48             | 27               | 1.0              | 0.7 | E39 c.5512C>G/p.(His1838Asp)                                 | E42 c.5882G>A/p.(Gly1961Glu)                                |
| 21             | F   | 48             | 12               | 0.9              | 0.9 | E39 c.5512C>G/p.(His1838Asp)                                 | E42 c.5882G>A/p.(Gly1961Glu)                                |
| <i>Group 2</i> |     |                |                  |                  |     |                                                              |                                                             |
| 22             | M   | 47             | 20               | 0.0              | 0.0 | E12 c.1622T>C/p.(Leu541Pro)<br>E21 c.3113C>T/p.(Ala1038Val)  | E44 c.6089G>A/p.(Arg2030Gln)                                |
| 23             | M   | 27             | 25               | 0.4              | 0.2 | E12 c.1719G>A/p.(Met573Ile)                                  |                                                             |
| 24             | F   | 60             | 49               | 0.2              | 0.1 | E36 c.5189G>A/p.(Trp1730*)                                   | E40 c.5603A>T/p.(Asn1868Ile)                                |
| 25             | F   | 39             | 33               | 0.0              | 0.1 | E8 c.1009T>C/p.(Phe337Leu)<br>I13 c.1937+1G>A (IVS13+1G>A)   | E40 c.5603A>T/p.(Asn1868Ile)                                |
| 26             | F   | 77             | 39               | 1.0              | 0.2 | E3 c.1822T>A/p.(Phe608Ile)<br>E40 c.5682G>C/p.(Leu1894Leu)   | E40 c.5603A>T/p.(Asn1868Ile)<br>I33 c.4773+48C>T            |
| 27             | F   | 39             | 18               | 1.1              | 1.2 | E12 c.1622T>C/p.(Leu541Pro)<br>E21c.3113C>T/p.(Ala1038Val)   | E17 c.2588G>C/p.(Gly863Ala)<br>E40 c.5603A>T/p.(Asn1868Ile) |

| No.            | Sex | Age<br>[Years] | Onset<br>[Years] | BCVA<br>[LogMAR] |     | ABCA4-gene mutations*                                                                  |                                                            |
|----------------|-----|----------------|------------------|------------------|-----|----------------------------------------------------------------------------------------|------------------------------------------------------------|
|                |     |                |                  | OD               | OS  | Allele 1                                                                               | Allele 2                                                   |
| 28             | M   | 17             | 8                | 1.1              | 1.0 | E12 c.1622T>C/p.(Leu541Pro)<br>E21 c.3113C>T/p.(Ala1038Val)                            | E22 c.3212C>T/p.(Ser1071Leu)                               |
| 29             | F   | 61             | 14               | 1.0              | 1.0 | E27 c.3871C>T/p.(Gln1291*)                                                             | E42 c.5882G>A/p.(Gly1961Glu)                               |
| 30             | M   | 50             | 49               | 0.0              | 0.6 | E30 c.4527dupC/p.(Gln1513Prof*42)<br>E31 c.4611G>A/p.(Thr1536Thr)                      | E40 c.5603A>T/p.(Asn1868Ile)                               |
| 31             | F   | 20             | 6                | 1.3              | 1.0 | E43 c.5917delG/p.(Val1973*)                                                            | I40 c.5714+5G>A                                            |
| 32             | M   | 61             | 49               | 0.1              | 0.1 | E1 c.52C>T/p.(Arg18Trp)<br>E17 c.1588G>A/p.(Gly863Ala)<br>E40 c.5603A>T/p.(ASn1868Ile) | E12 c.1715G>A/p.(Arg572Gln)<br>E19 c.2828G>A/p.(Arg943Gln) |
| 33             | F   | 63             | 49               | 0.4              | 0.1 | E23 c.3468C>G/p.(Tyr1156*)                                                             | E36 c.5059A>T/p.(Ile1687Phe)                               |
| 34             | F   | 61             | 30               | 1.5              | 1.0 | E23 c.3468C>G/p.(Tyr1156*)                                                             | E36 c.5059A>T/p.(Ile1687Phe)                               |
| 35             | F   | 41             | 30               | 0.8              | 0.8 | E1 c.45G>A/p.(Trp15*)                                                                  | E16 c.2401G>A/p.(Ala801Thr)                                |
| 36             | F   | 44             | 20               | 0.9              | 0.9 | E28 c.4234C>T/p.(Gln1412*)                                                             | E42 c.5882G>A/p.(Gly1961Glu)                               |
| 37             | M   | 9              | 7                | 0.6              | 0.7 | E12 c.1622T>C/p.(Leu541Pro)<br>E21 c.3113C>T/p.(Ala1038Val)                            |                                                            |
| 38             | F   | 46             | 25               | 0.6              | 0.7 | E16 c.2401G>A/p.(Ala801Thr)                                                            | E28 c.4234C>T/p.(Gln1412*)                                 |
| <i>Group 3</i> |     |                |                  |                  |     |                                                                                        |                                                            |
| 39             | F   | 39             | 30               | 1.2              | 0.9 | E49 c.6746C>A/p.(Ala2249Asp)                                                           | E49 c.6746C>A/p.(Ala2249Asp)                               |
| 40             | M   | 29             | 6                | 1.2              | 1.4 | E30 c.4462T>C/p.(Cys1488Arg)                                                           | E30 c.4462T>C/p.(Cys1488Arg)                               |
| 41             | F   | 18             | 9                | 1.1              | 1.0 | E39 c.5549T>C/p.(Leu1850Pro)                                                           | E39 c.5509C>A/p.(Pro1837Thr)                               |
| 42             | F   | 28             | 9                | 1.2              | 1.1 | E39 c.5549T>C/p.(Leu1850Pro)                                                           | E39 c.5509C>A/p.(Pro1837Thr)                               |
| 43             | F   | 39             | 12               | 1.0              | 0.8 | E36 c.5172G>A/p.(Trp1724*)                                                             | E36 c.5172G>A/p.(Trp1724*)                                 |
| 44             | F   | 50             | 44               | 0.1              | 0.1 | E29 c.4347G>T/p.(Trp1449Cys)                                                           |                                                            |

\* = Nomenclature of mutations followed standards of the Human Genome Variation Society (HGVS)

No. = number, F = female, M = male, BCVA = best corrected visual acuity, LogMAR = logarithm of the minimum angle of resolution, OD = right eye, OS = left eye
